# Supplementary material for: Seasonal Influence on the Performance of Low-Cost NO2 Sensor Calibrations
Source: MDPI journal article supplement (doi:10.3390/s21237919), 2021-11-27
Supplement: s1 [file s1]

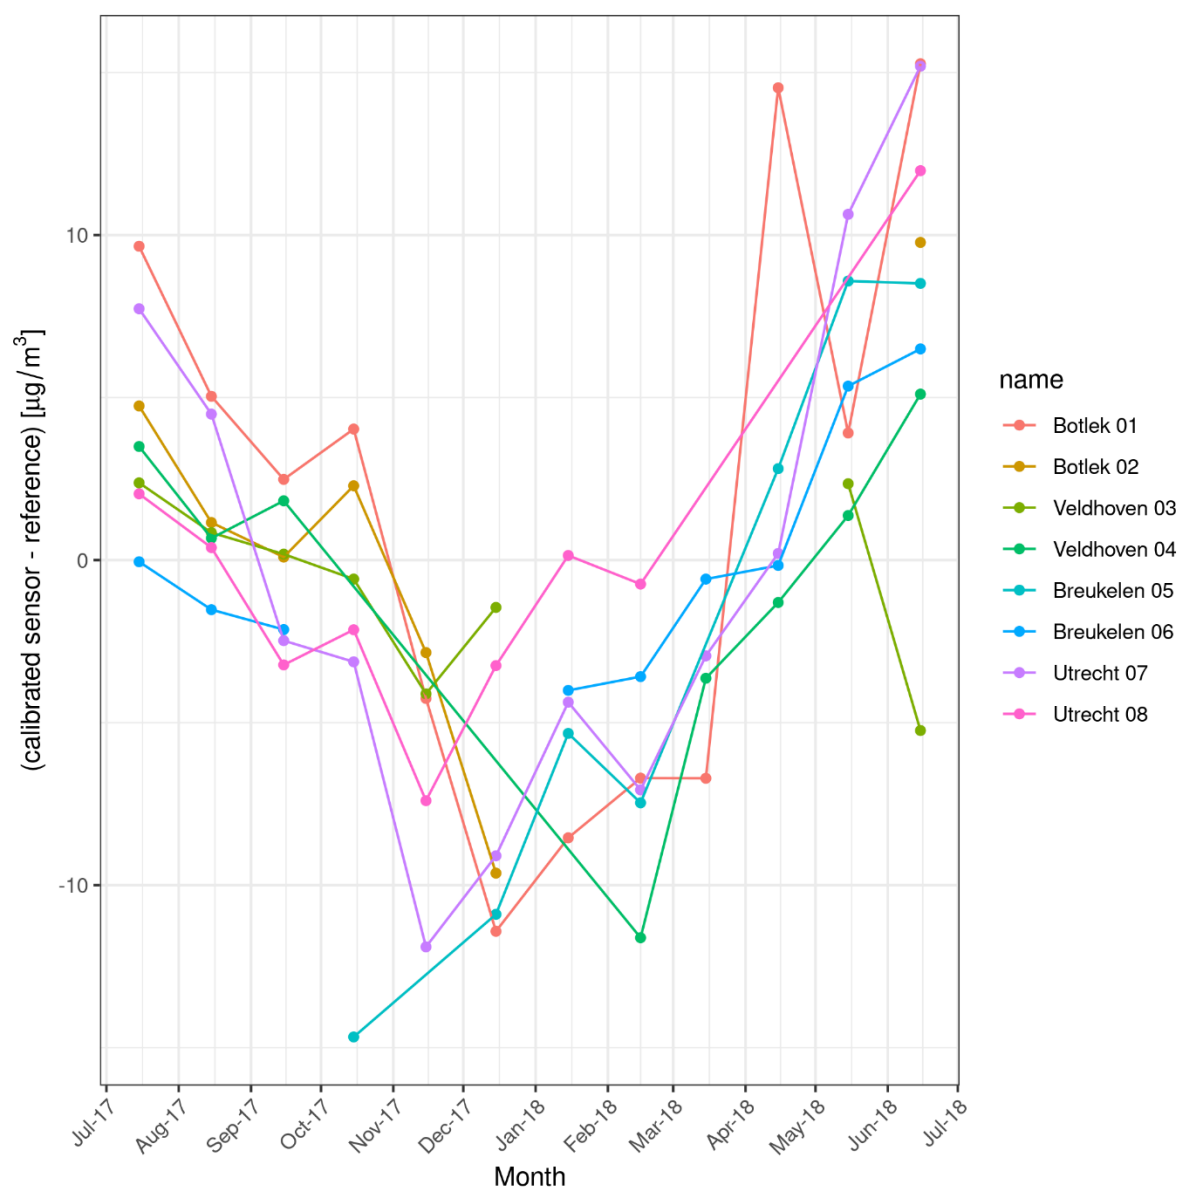

Figure S1. Monthly averaged difference between the NO<sub>2</sub> sensor, calibrated using simple linear regression and the reference NO<sub>2</sub> concentration.

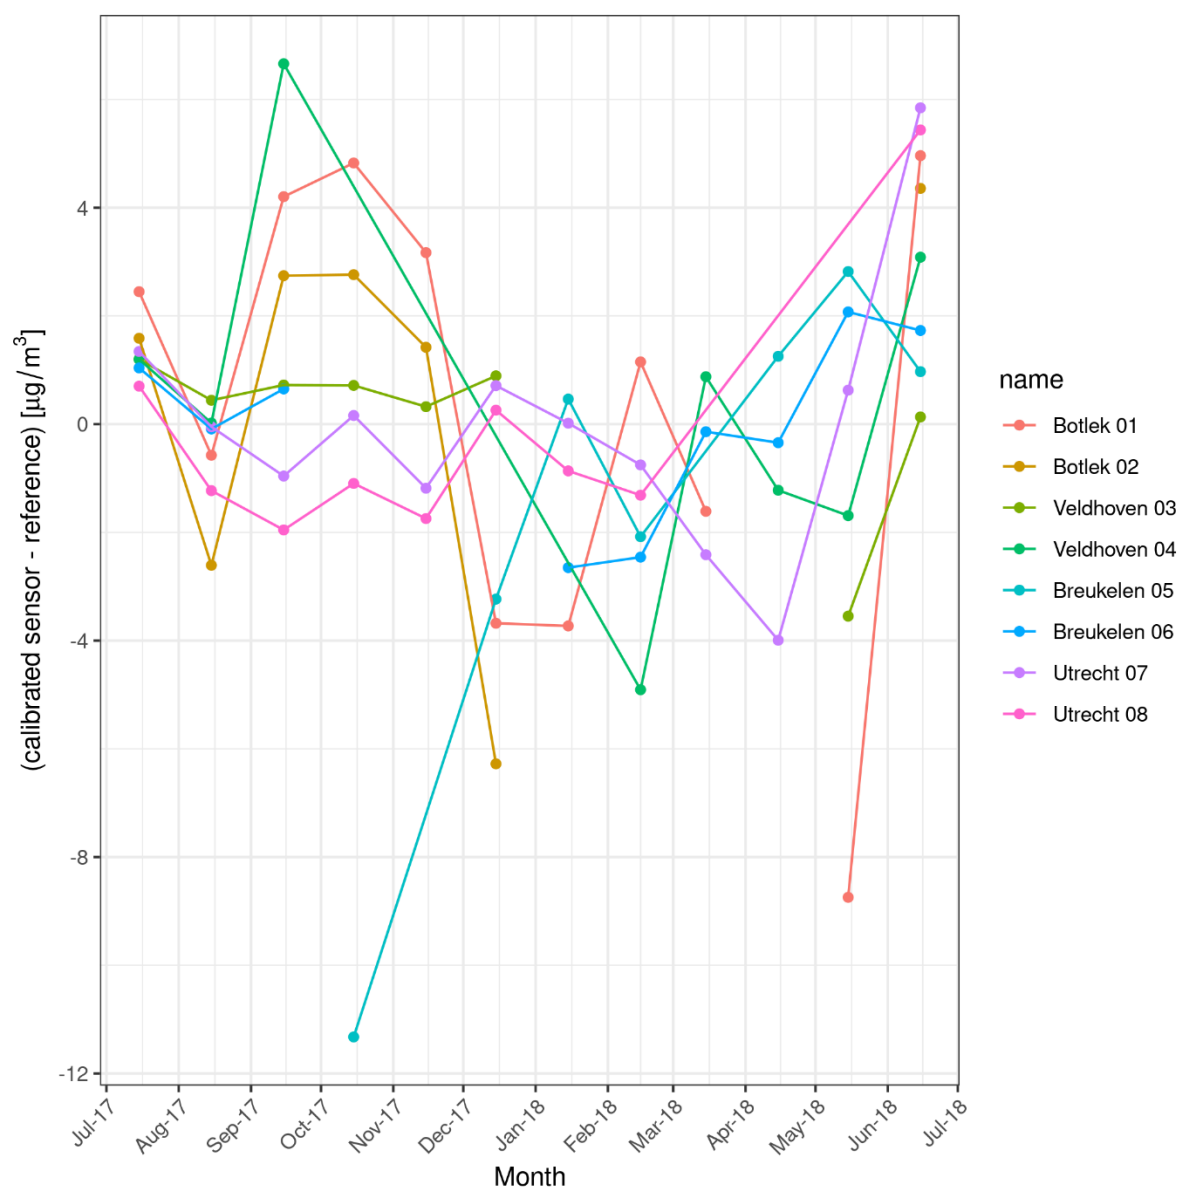

Figure S2. Monthly averaged difference between the NO<sub>2</sub> sensor, calibrated using multivariate linear regression (based on the sensor NO<sub>2</sub> signal, the sensor temperature and the reference O<sub>3</sub> concentration) and the reference NO<sub>2</sub> concentration.

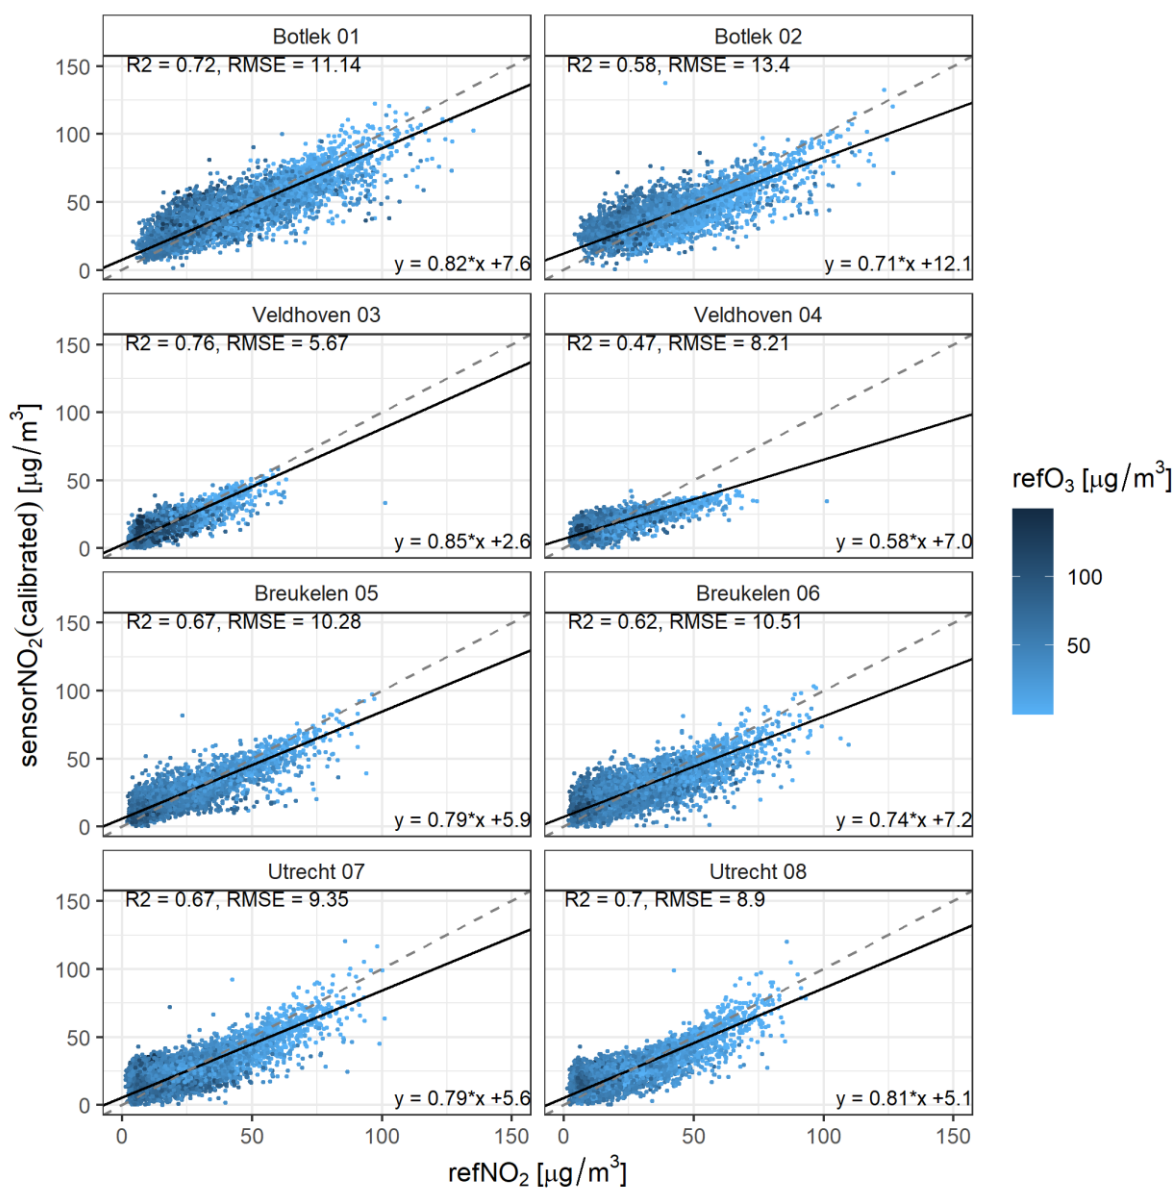

Figure S3. Scatterplots for sensors, calibrated with the NO<sub>2</sub> sensor signal, the sensor temperature and the O<sub>3</sub> sensor signal.

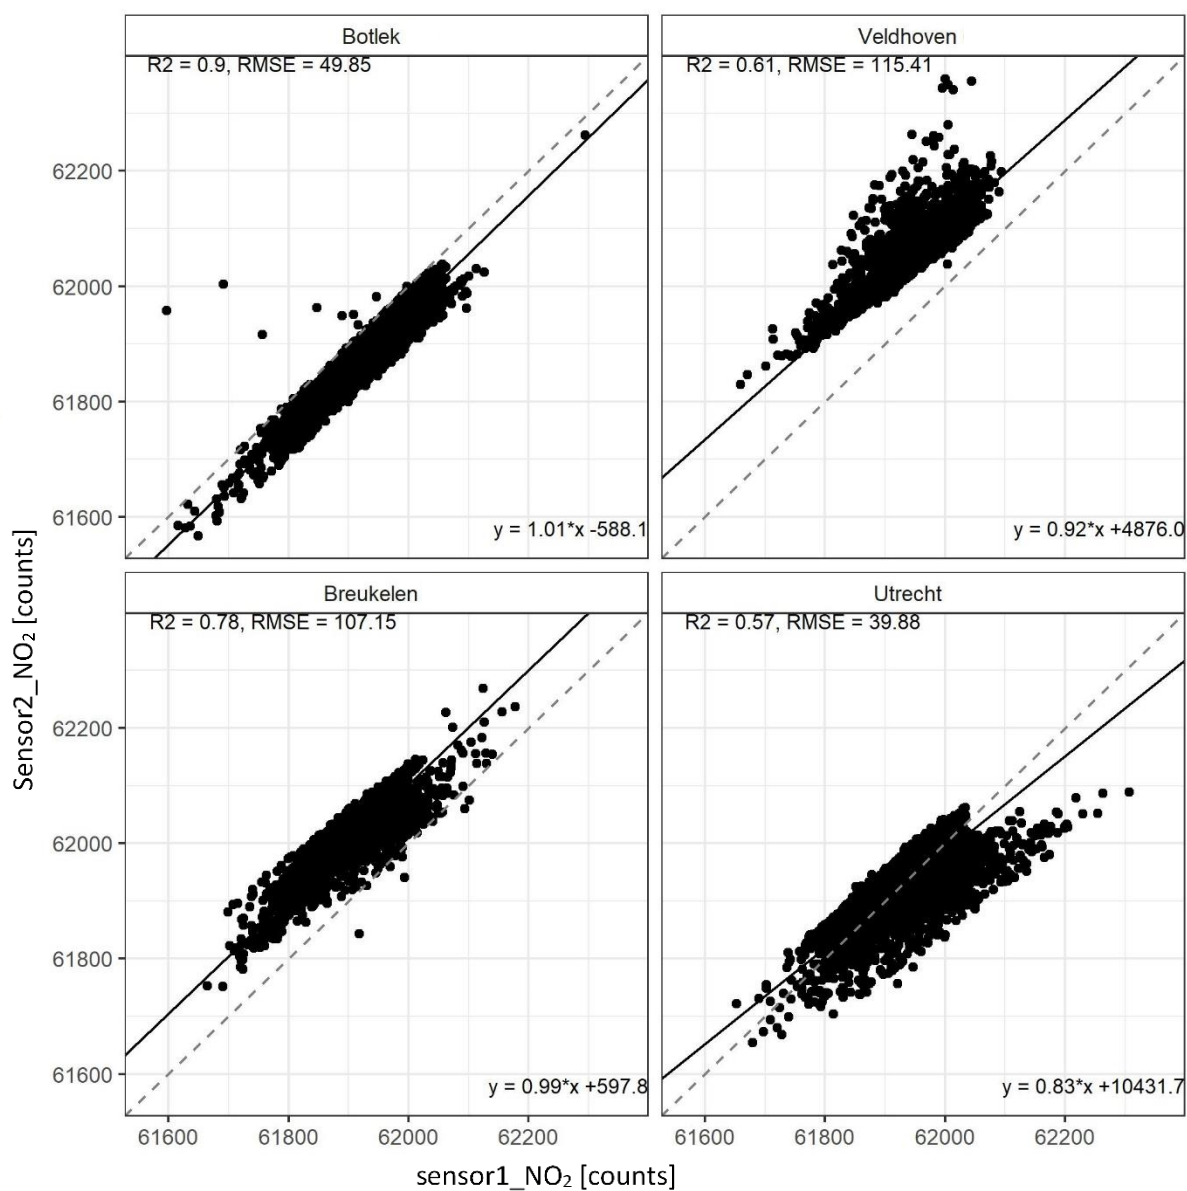

Figure S4. Scatter of NO<sub>2</sub> sensor signal of co-located sensor pairs at the four measurement locations.
